# Supplementary material for: Therapeutic Potential of Chemically Modified miR-489 in Triple-Negative Breast Cancers
Source: MDPI journal article supplement (doi:10.3390/cancers12082209), 2020-08-07

## **Supplementary Materials**

### **Therapeutic potential of chemically modified miR-489 in Triple Negative Breast Cancers**

Young Hwa Soun<sup>1†</sup>, Heesung Chung<sup>1,3†</sup>, Cecilia Yan<sup>1</sup>, Andrew Fesler<sup>1</sup>, Hyungjin Kim<sup>2</sup>, Eok-Soo Oh<sup>3</sup>, Jingfang Ju<sup>1</sup> and Jun Chung<sup>1\*</sup>

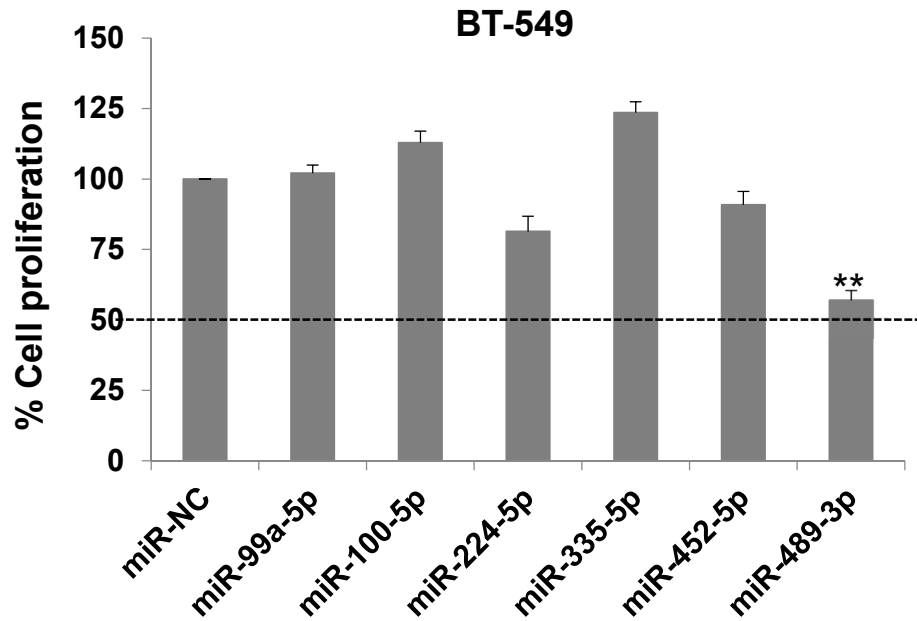

**Figure S1.** BT-549 cells transfected with indicated miRNA mimics were incubated for 96 hrs. Proliferation of these cells was measured by MTT assay. Data are represented as mean  $\pm$  SD (n = 3). \*\* $P < 0.01$  compared with the control

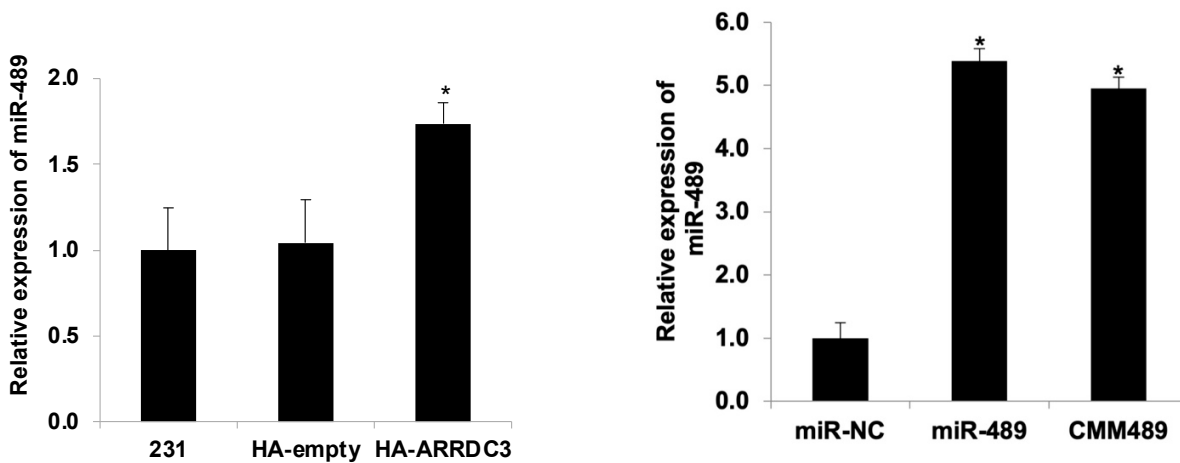

**Figure S2.** miR-489 expression level quantitated by qRT-PCR in MDA-MB-231 cells. RNAs were isolated from cells transfected with indicated (A) vector or (B) miRNAs. qRT-PCR was performed as described in the Material and Method section. Column, mean from at least three independent experiments; bars, SD. The statistical analysis was done using Student's *t* test. \*,  $P < 0.05$ .

**Figure S3.** Full pictures of the western blots. Images of band were acquired using ChemiDoc Imaging system with ImageLab software 6. 1. (Bio-Rad).

**The Western blot original images for Figure 1C**

MDA-MB-231

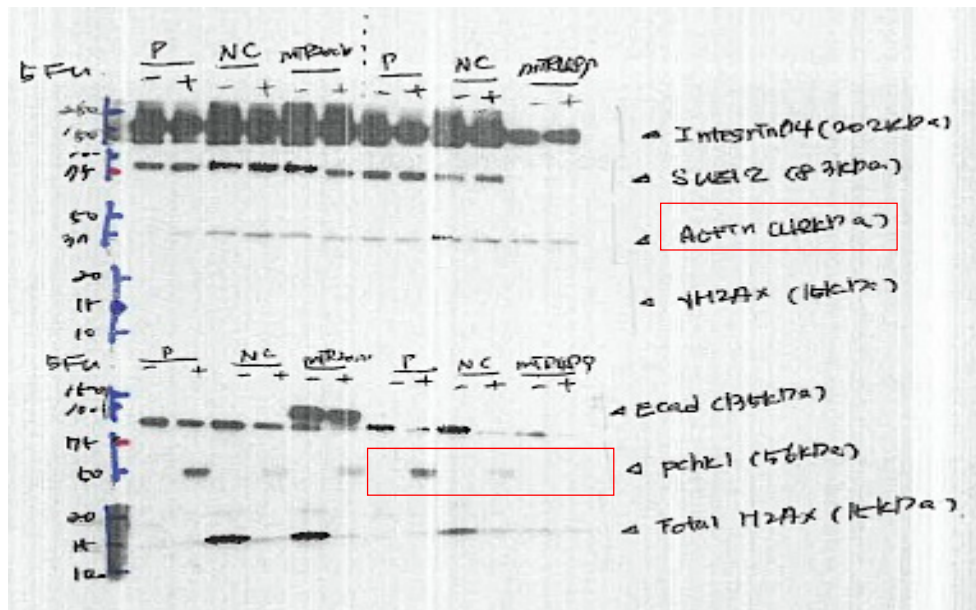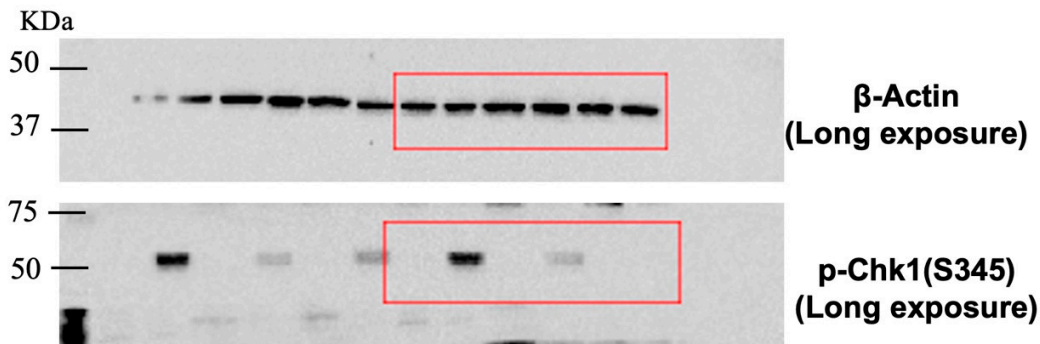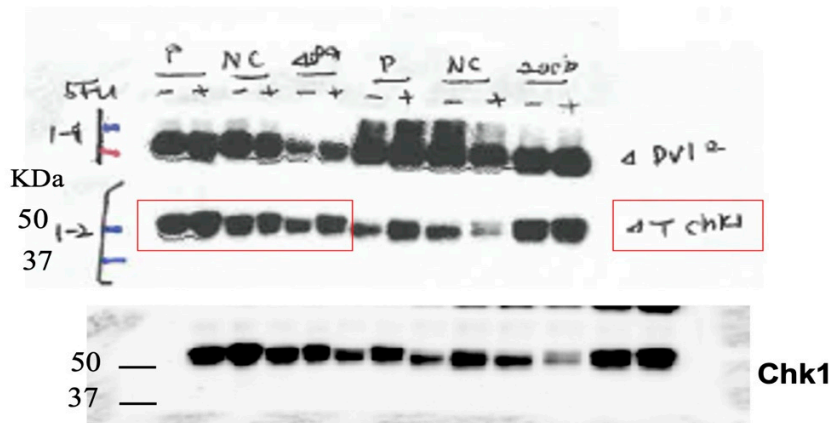

The Western blot original images for Figure 1C

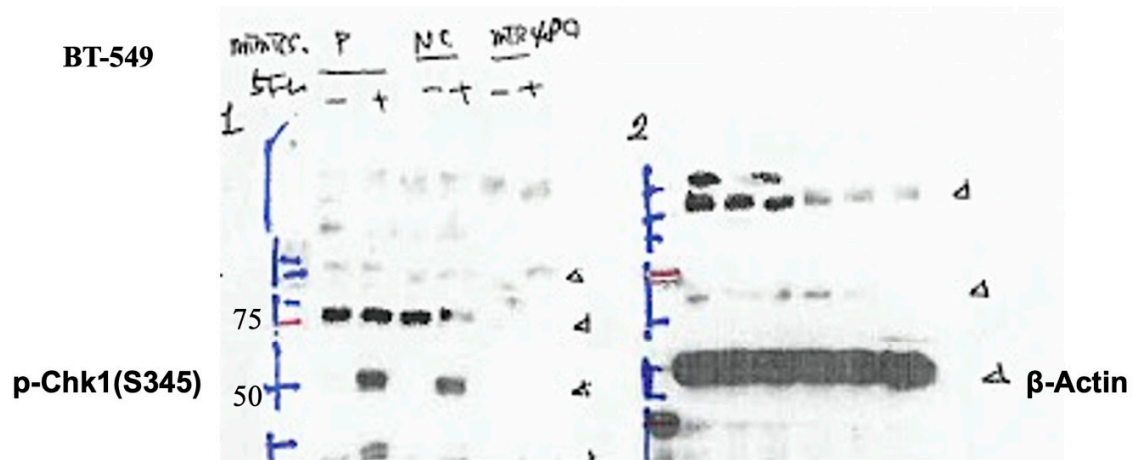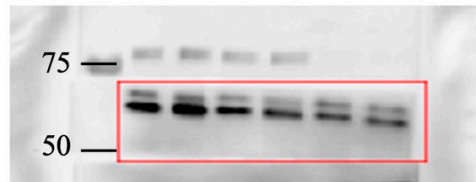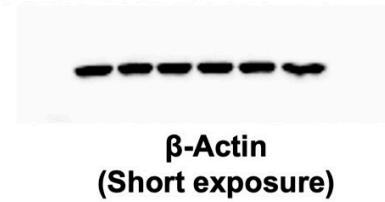

**MDA-MB-468**

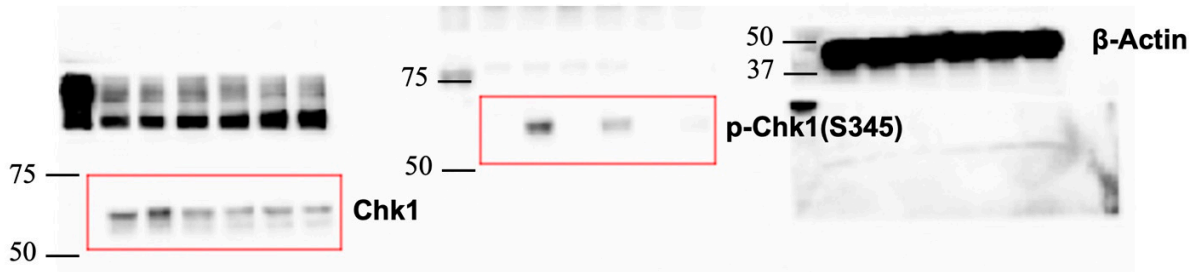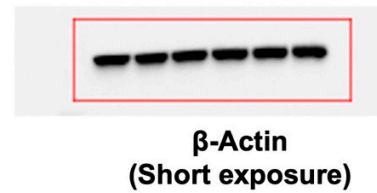

The Western blot original images for Figure 2B

MDA-MB-231

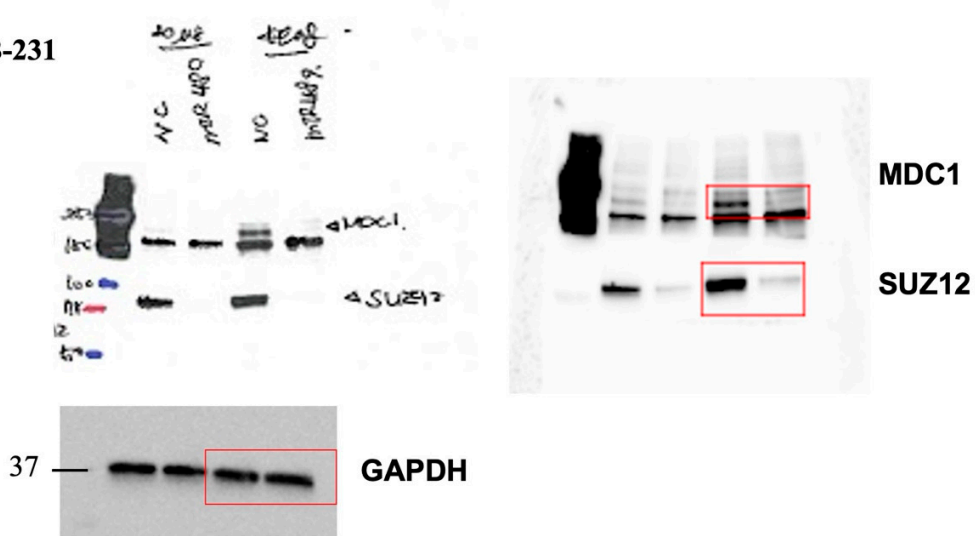

HCC-1937

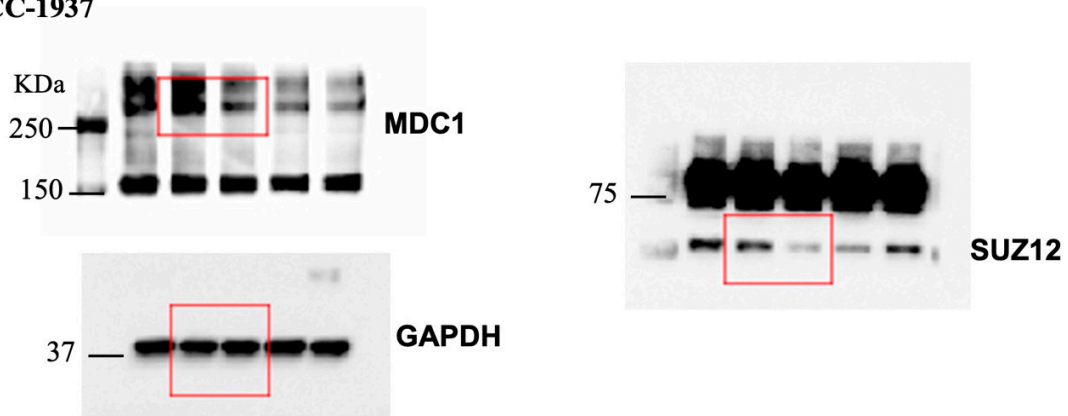

BT-549

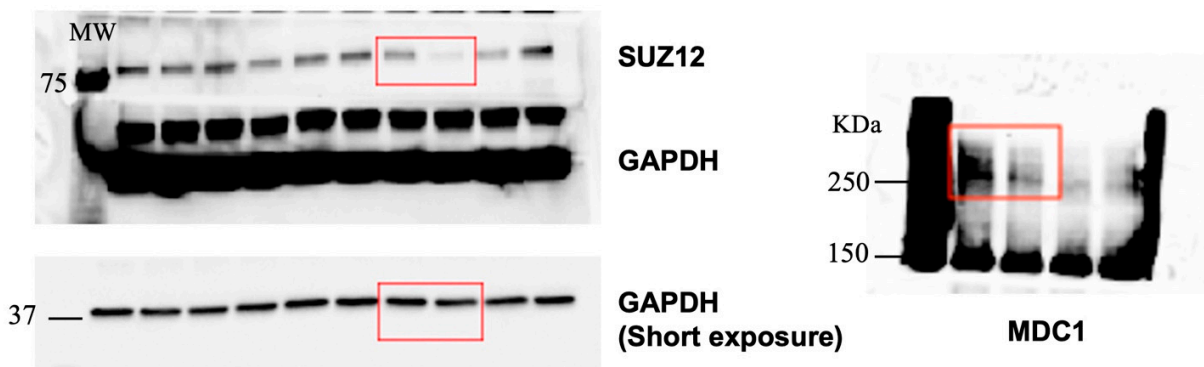

The Western blot original images for Figure 2C

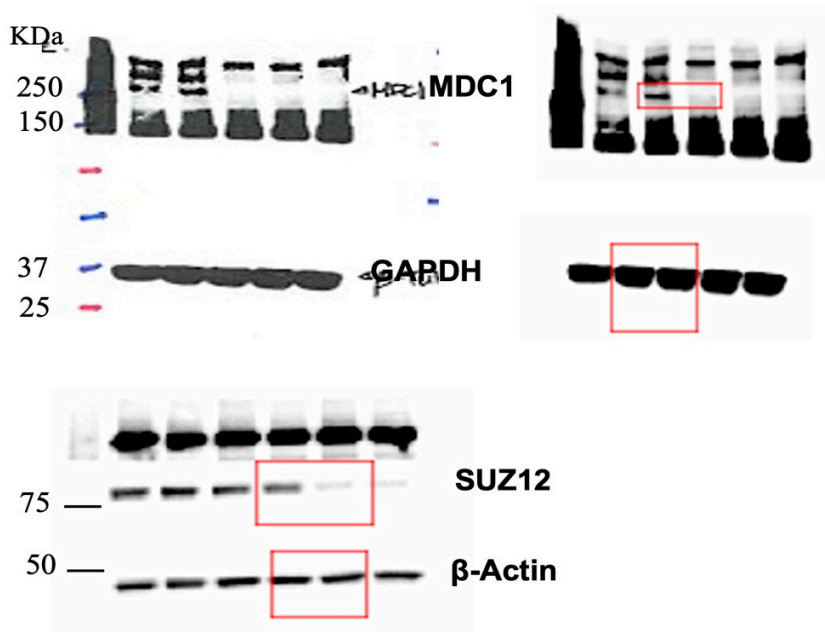

The Western blot original images for Figure 3B

MDA-MB-231

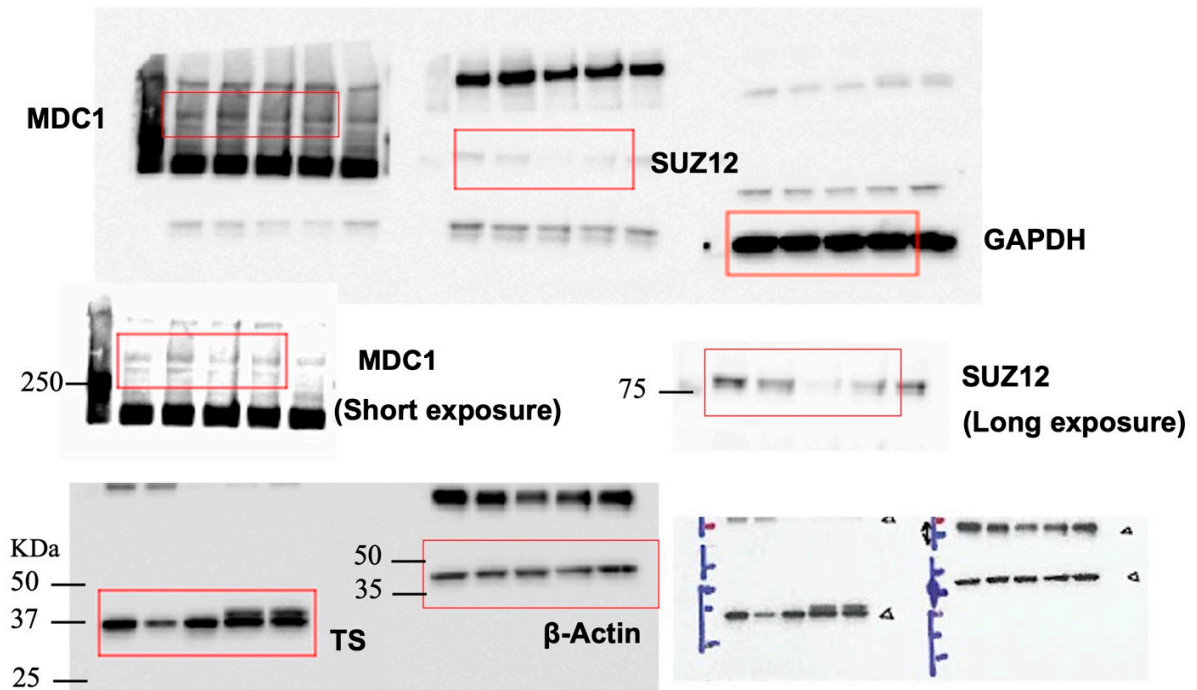

The Western blot original images for Figure 3B

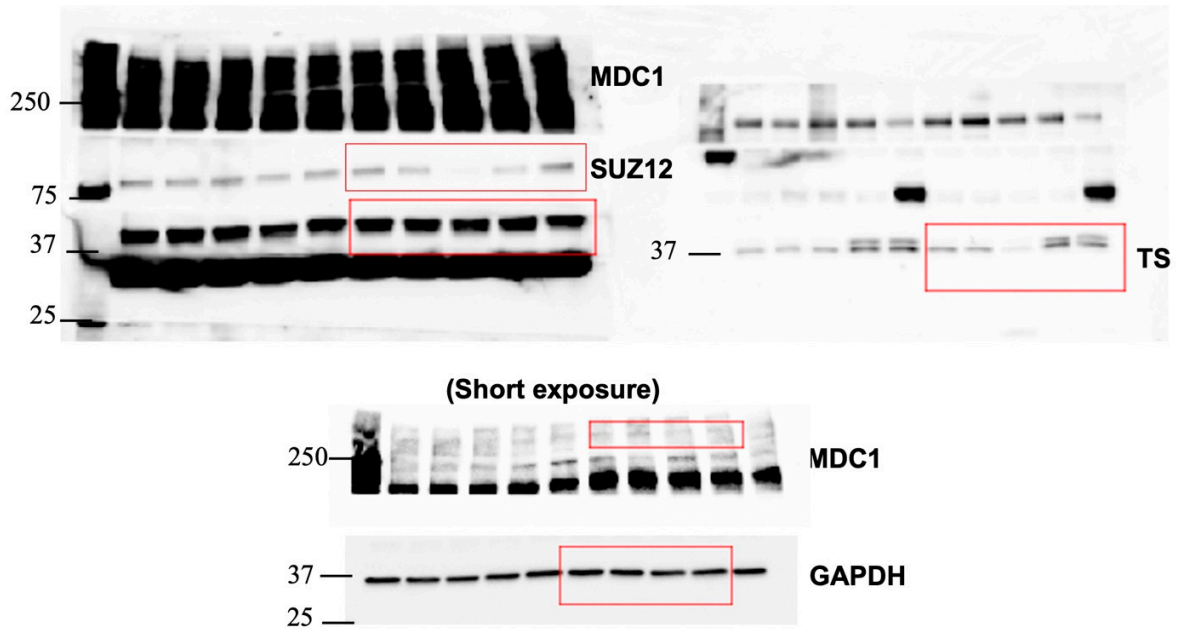

The Western blot original images for Figure 4C

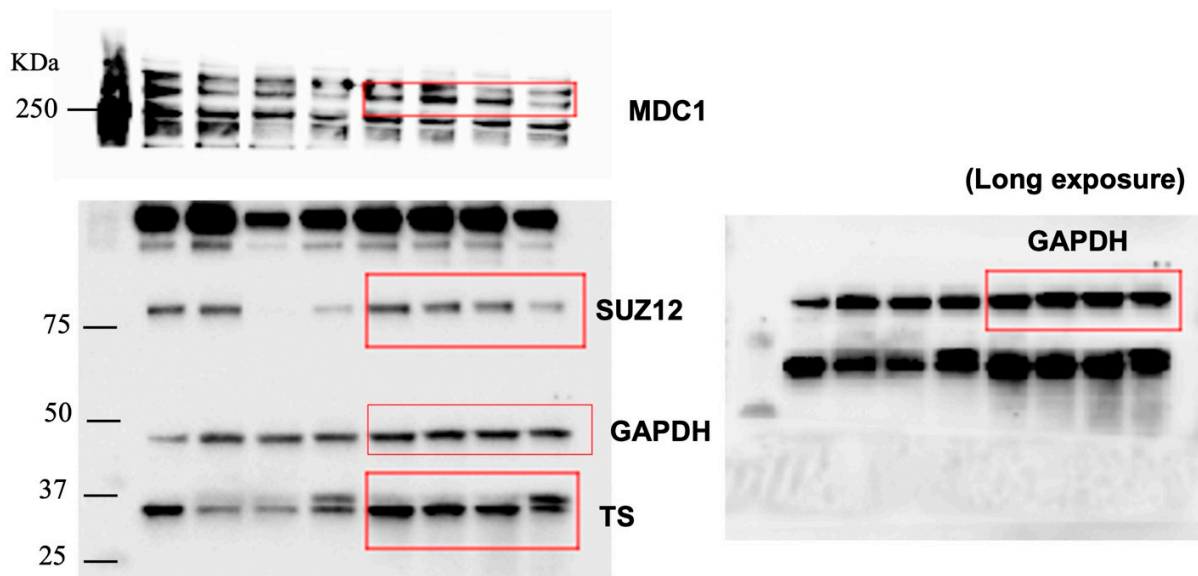

Supplement: s1 [file s1]
